# Supplementary material
Source: PubMed Central journal article supplement (PMC9020581)
Supplement: NEJMoa2201688_appendix.pdf [file NEJMoa2201688_appendix.pdf]

## Supplementary Appendix

Supplement to: Magen O, Waxman JG, Makov-Assif M, et al. Fourth dose of BNT162b2 mRNA Covid-19 vaccine in a nationwide setting. *N Engl J Med*. DOI: 10.1056/NEJMoa2201688

This appendix has been provided by the authors to give readers additional information about the work.

# Fourth Dose of BNT162b2 mRNA COVID-19 Vaccine in a Nationwide Setting

Ori Magen, M.D.,\*<sup>1</sup>, Jacob G. Waxman, M.D.,\*<sup>1</sup>, Maya Makov-Assif, M.D.,\*<sup>1</sup>, Roni Vered, M.D.,<sup>2</sup>, Dror Dicker, M.D.,<sup>3,13</sup>, Miguel A. Hernán, M.D.,<sup>5,6</sup>, Marc Lipsitch, D.Phil.,<sup>7</sup>, Ben Y. Reis, Ph.D.,<sup>4,8,9</sup>, Ran D. Balicer, M.D.,<sup>1,4,10</sup>, Noa Dagan, M.D.<sup>1,4,11,12</sup>

<sup>1</sup> Clalit Research Institute, Innovation Division, Clalit Health Services, Tel Aviv, Israel

<sup>2</sup> Tel-Aviv District, Community Division, Clalit Health Services, Tel Aviv, Israel

<sup>3</sup> Department “D” of internal Medicine at Hasharon Hospital Rabin Medical Center, Petah Tikva, Israel

<sup>4</sup> The Ivan and Francesca Berkowitz Family Living Laboratory Collaboration at Harvard Medical School and Clalit Research Institute, Boston, MA, USA

<sup>5</sup> Departments of Epidemiology and Biostatistics, Harvard T.H. Chan School of Public Health, Boston, MA, USA

<sup>6</sup> CAUSALab, Harvard T.H. Chan School of Public Health, Boston, MA, USA

<sup>7</sup> Center for Communicable Disease Dynamics, Department of Epidemiology and Department of Immunology and Infectious Diseases, Harvard T.H. Chan School of Public Health, Boston, MA, USA

<sup>8</sup> Predictive Medicine Group, Computational Health Informatics Program, Boston Children’s Hospital, Boston, MA, USA

<sup>9</sup> Harvard Medical School, Boston, MA, USA

<sup>10</sup> School of Public Health, Faculty of Health Sciences, Ben Gurion University of the Negev, Be'er Sheva, Israel

<sup>11</sup> Software and Information Systems Engineering, Ben Gurion University, Be'er Sheva, Israel

<sup>12</sup> Department of Biomedical Informatics, Harvard Medical School, Boston, MA, USA

<sup>13</sup> Sackler School of Medicine, Tel-Aviv University, Tel-Aviv, Israel.

\* These authors contributed equally

## Author contributions

O.M., J.G.W. and M.M.A., contributed equally. All authors conceived and designed the study. O.M., J.G.W., M.M.A. and N.D. participated in data extraction and analysis. All authors wrote the manuscript. All authors critically reviewed the manuscript and decided to proceed with publication. R.D.B. and N.D. supervised the study and vouch for the data and analysis.

## Corresponding Author:

Noa Dagan, MD PhD

Clalit Research Institute, Innovation Division, Clalit Health Services, Tel Aviv, Israel

NoaDa@clalit.org.il

## Contents

|                                                                                                                                                                                                                    |    |
|--------------------------------------------------------------------------------------------------------------------------------------------------------------------------------------------------------------------|----|
| <b>Methods S1</b> - Functional form for Poisson regression models .....                                                                                                                                            | 3  |
| <b>Figure S1</b> – SARS-CoV-2 PCR tests in the matched exposure groups over the study period.....                                                                                                                  | 4  |
| <b>Figure S2</b> – Sensitivity analysis in which censoring of matched pairs is delayed by 7 days following receipt of a fourth vaccine by the control group individual .....                                       | 5  |
| <b>Table S1</b> –Variables Used to Define Exposures, Outcomes, Eligibility and Adjustment .....                                                                                                                    | 8  |
| <b>Table S2</b> – A comparison of the baseline characteristics of the total eligible vaccinated population, the matched vaccinated population and the unmatched (to the exposed group) vaccinated population ..... | 15 |
| <b>Table S3</b> - Vaccine effectiveness (1 - Risk Ratio) and Risk Difference for the sensitivity analysis in which censoring of control members who received a fourth vaccine dose is delayed by 7 days.....       | 17 |
| <b>Table S4</b> - Vaccine effectiveness (VE) estimates for the Poisson Regression days 7+ model.....                                                                                                               | 18 |
| <b>Table S5</b> - Vaccine effectiveness (VE) estimates for the Poisson Regression days 14+ model.....                                                                                                              | 18 |
| <b>Table S6</b> - Vaccine effectiveness (VE) estimates for the Poisson Regression daily vaccine effectiveness (1-IRR) model .....                                                                                  | 19 |

## Methods S1 - Functional form and fit for Poisson regression models

$$\Rightarrow \log(\text{incidence rate}) = \log(\text{events} / \text{time}) = \alpha + \beta_1 X_1 + \beta_2 X_2 + \dots + \beta_n X_n$$

$$\Rightarrow \log(\text{events}) = \alpha + \beta_1 X_1 + \beta_2 X_2 + \dots + \beta_n X_n + \log(\text{time})$$

- Events = number of individuals with the outcome of interest
- Time = Number of person-days of follow-up
- Coefficients ( $x_1$ - $x_n$ ) include:
  - Time-varying exposure (specific to each model\*)
  - Age
  - Sex
  - Local COVID-19 burden (the day previously)
  - Population sector
  - Number of CDC risk factors for severe COVID-19
  - Number of hospital admissions in the past 3 years
  - Calendar month of third vaccine dose
  - Calendar date (of each day of follow-up)

- \*  
1. {no exposure, days 1-4 following 4<sup>th</sup> vaccine dose, days 5-6, and day 7+}  
2. {no exposure, days 1-4, days 5-6, days 7-13, and day 14+}  
3. {no exposure, and each day of follow-up treated as a separate category}

$$\Rightarrow \text{Chi-squared goodness-of-fit test of residual deviance: } P = 1$$

**Figure S1 – SARS-CoV-2 PCR tests in the matched exposure groups over the study period**

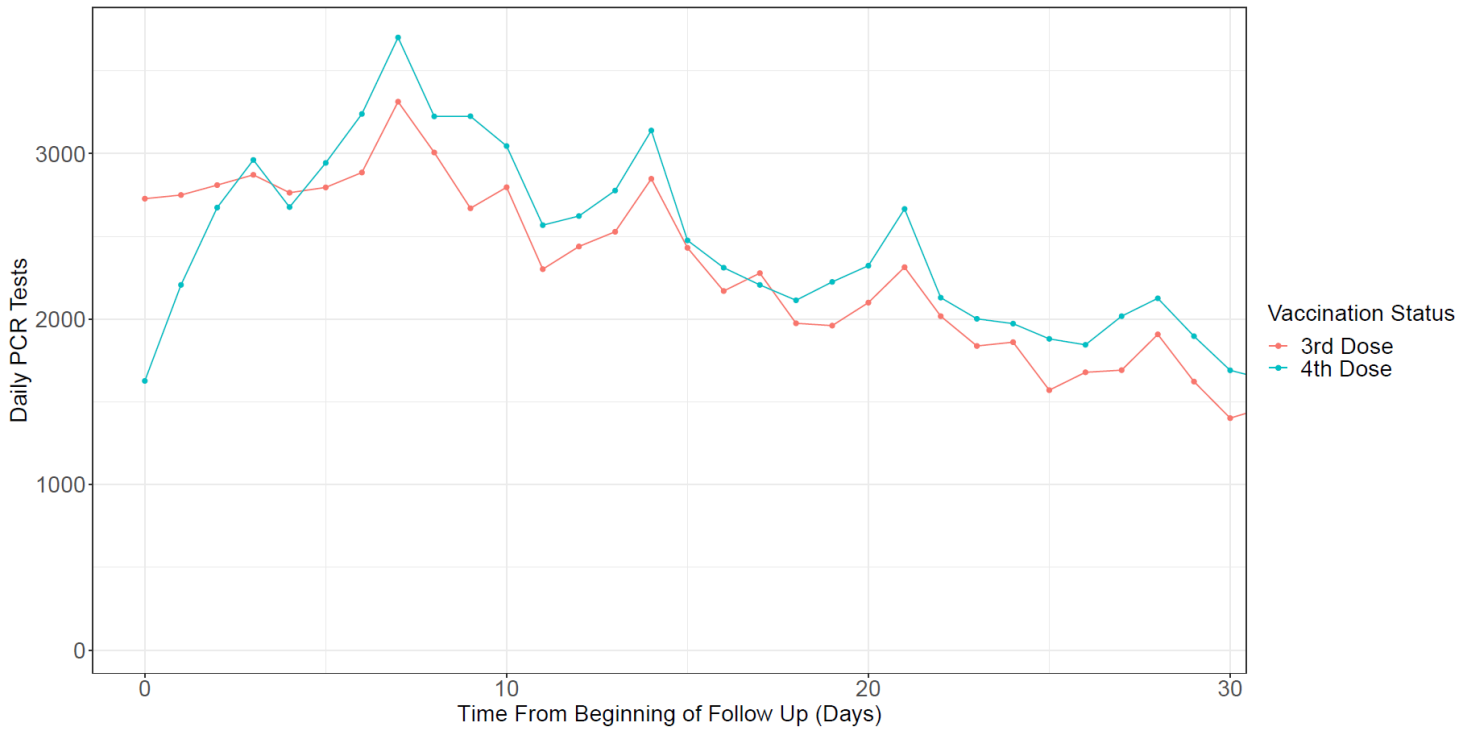

A graph demonstrating the number of SARS-CoV-2 PCR tests performed in the 3<sup>rd</sup> vaccine dose group (red) and the 4<sup>th</sup> vaccine dose group (blue) over the study period (January 3<sup>rd</sup>, 2022 – February 18<sup>th</sup>, 2022) in the PCR-confirmed documented SARS-CoV-2 infection cohort.

**Figure S2 – Sensitivity analysis in which censoring of matched pairs is delayed by 7 days following receipt of a fourth vaccine by the control group individual**

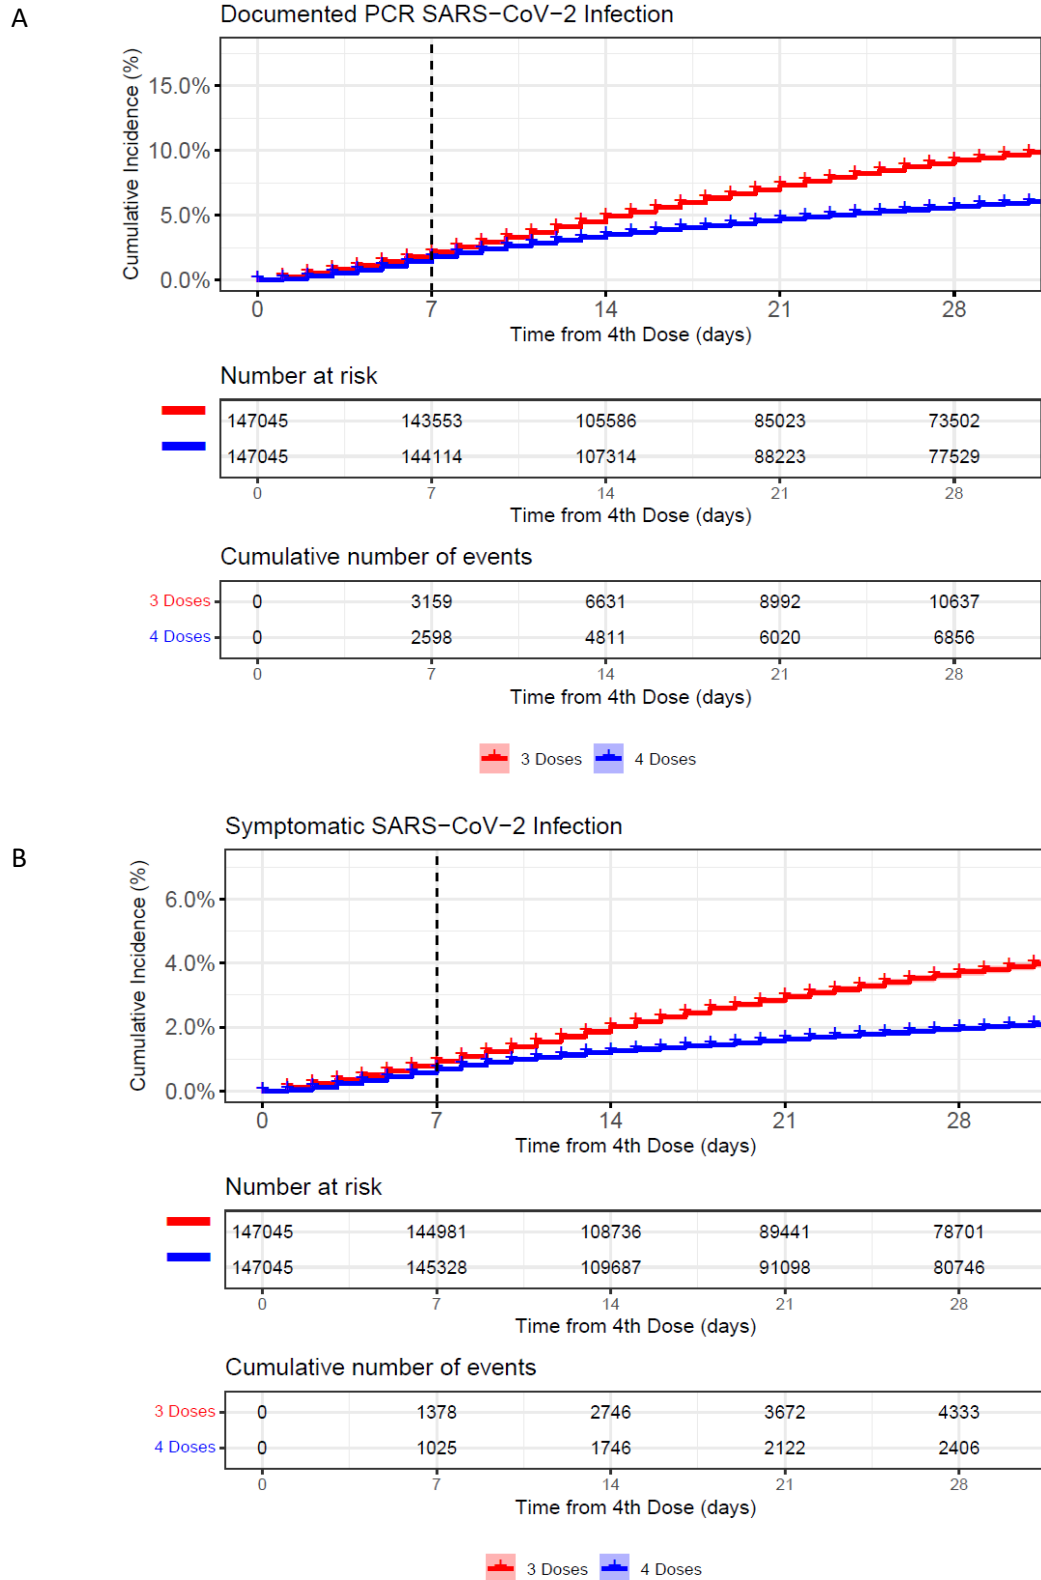

C

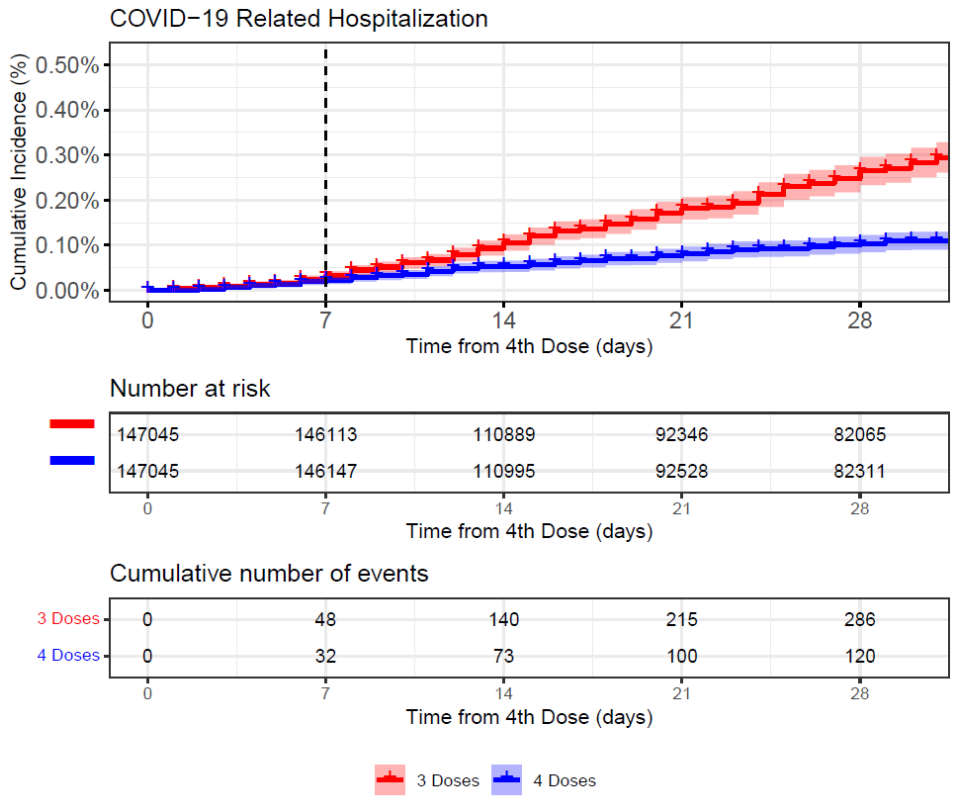

D

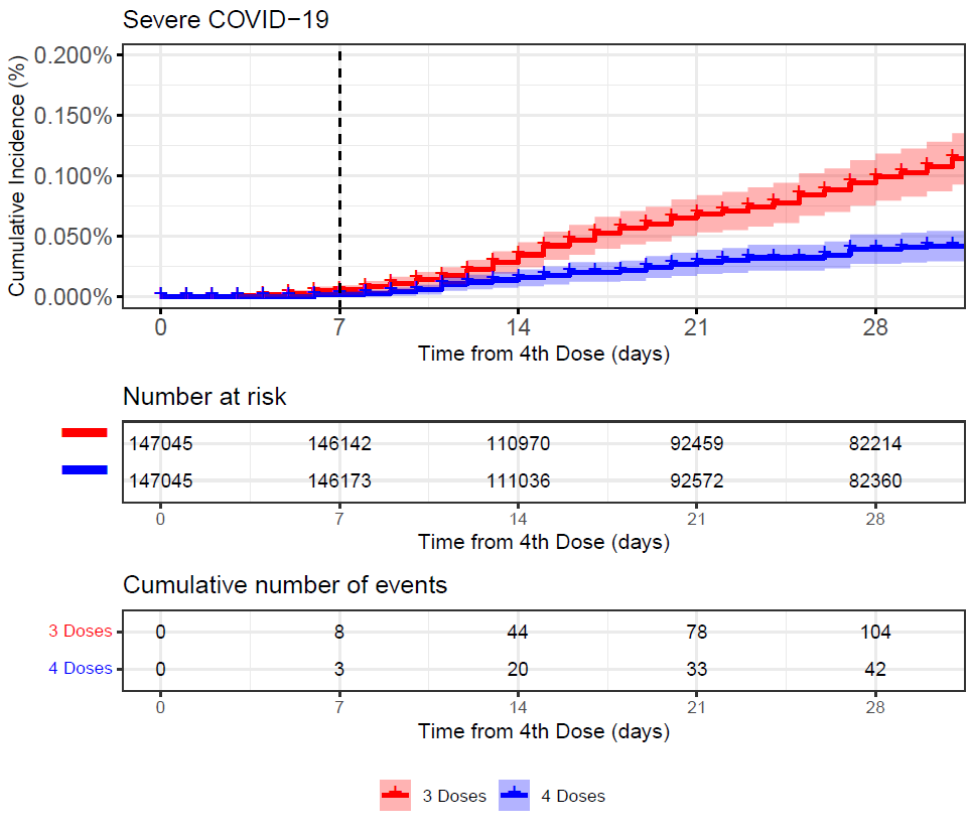

E

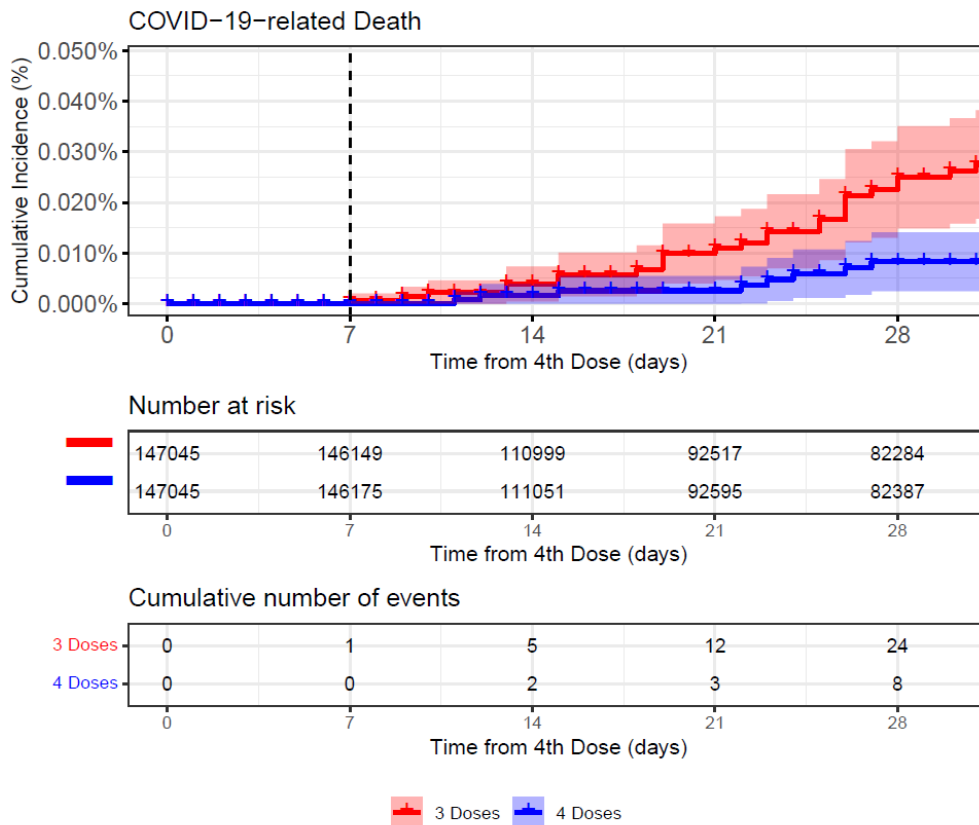

Cumulative incidence curves, calculated using the Kaplan-Meier estimator (1 – the Kaplan-Meier risk) for individuals in the study group and the control group across all five COVID-19-related outcomes (A: infection, B: symptomatic COVID-19, C: COVID-19-related hospitalization, D: severe COVID-19 illness, E: COVID-19-related death). The dashed vertical line marks day 7 – the day the primary analysis begins.



## Table S1 – Variables Used to Define Exposures, Outcomes, Eligibility and Adjustment

Names, potential values, definitions and time periods for all variables used in the study to define exposure, eligibility and perform adjustment. Variables were defined using internal CHS registries, ICD-9 codes, and ATC codes. PCR: Polymerase Chain Reaction; CHS: Clalit Health Services; ICD: International Classification of Disease; ATC: Anatomic therapeutic chemical; COPD: Chronic Obstructive Pulmonary Disease.

| Variable                                                                                                                                  | Definitions <sup>1</sup>                                                                                                                                                                                                                                                                                                                                                                                                                                                                                                                        | Timing <sup>2</sup>                                                            | Values        |         |
|-------------------------------------------------------------------------------------------------------------------------------------------|-------------------------------------------------------------------------------------------------------------------------------------------------------------------------------------------------------------------------------------------------------------------------------------------------------------------------------------------------------------------------------------------------------------------------------------------------------------------------------------------------------------------------------------------------|--------------------------------------------------------------------------------|---------------|---------|
|                                                                                                                                           |                                                                                                                                                                                                                                                                                                                                                                                                                                                                                                                                                 |                                                                                | Main analysis | Poisson |
| <b>Exposure</b>                                                                                                                           |                                                                                                                                                                                                                                                                                                                                                                                                                                                                                                                                                 |                                                                                |               |         |
| Individuals 60 years of age and older, vaccinated with a fourth dose of the BNT162b2 mRNA vaccine                                         | Four doses of BNT162b2 mRNA COVID-19 Vaccine                                                                                                                                                                                                                                                                                                                                                                                                                                                                                                    | Administration of the fourth dose on or after January 3 <sup>rd</sup> 2022     | 0/1           | 0/1     |
| Individuals 60 years of age and older, eligible to receive a fourth dose, who have not yet received a fourth dose as of the matching date | Three doses of BNT162b2 mRNA COVID-19 Vaccine at least 4 months earlier                                                                                                                                                                                                                                                                                                                                                                                                                                                                         | Administration of the third dose at least 4 months prior to the index date     | 0/1           | 0/1     |
| <b>Outcome</b>                                                                                                                            |                                                                                                                                                                                                                                                                                                                                                                                                                                                                                                                                                 |                                                                                |               |         |
| PCR-confirmed COVID-19 infection                                                                                                          | A PCR confirmed infection.                                                                                                                                                                                                                                                                                                                                                                                                                                                                                                                      | The date of a specimen collection that was found to be positive in a PCR test. | 0/1           | 0/1     |
| Symptomatic COVID-19                                                                                                                      | A PCR-confirmed infection with report of symptoms during the PCR referral / during the follow-up in the community setting / COVID-19 related hospitalization / COVID-19 related death. Existing symptoms were considered when the physician or nurse checked the "symptomatic" option in the EMR, or when the following specific symptoms were recorded: fever or chills, cough, shortness of breath or difficulty breathing, sore throat, headache, weakness, congestion or runny nose, myalgia, nausea or vomiting, diarrhea, abdominal pain, | The date set for the SARS-CoV-2 infection outcome.                             | 0/1           | 0/1     |

|                                                  |                                                                                                                                                                                                                                                                                                                                                                                                                                                                                                      |                                                                                                                       |                 |                 |
|--------------------------------------------------|------------------------------------------------------------------------------------------------------------------------------------------------------------------------------------------------------------------------------------------------------------------------------------------------------------------------------------------------------------------------------------------------------------------------------------------------------------------------------------------------------|-----------------------------------------------------------------------------------------------------------------------|-----------------|-----------------|
|                                                  | loss of taste or smell,<br>inability to eat or drink.                                                                                                                                                                                                                                                                                                                                                                                                                                                |                                                                                                                       |                 |                 |
| COVID-19 related hospitalization                 | A hospitalization that was reported to the Israeli MOH as a hospitalization of a SARS-CoV-2 infected individual.                                                                                                                                                                                                                                                                                                                                                                                     | The start date of the hospitalization                                                                                 | 0/1             | 0/1             |
| Severe COVID-19 illness                          | As defined by the hospitalizing institution per the Israeli MOH guidelines, consistent with the NIH criteria for severe illness or critical illness:<br>Individuals who have SpO2 <94% on room air at sea level, a ratio of arterial partial pressure of oxygen to fraction of inspired oxygen (PaO2/FiO2) <300 mmHg, respiratory frequency > 30 breaths/min, or lung infiltrates >50%. Critical Illness: Individuals who have respiratory failure, septic shock, and/or multiple organ dysfunction. | The first date during the hospitalization in which the individual was flagged as being In a severe or critical state. | 0/1             | 0/1             |
| COVID-19 related Death                           | A death of a SARS-CoV-2 infected individual reported to the Israeli MOH.                                                                                                                                                                                                                                                                                                                                                                                                                             | The reported date of death.                                                                                           | 0/1             | 0/1             |
| <b>Eligibility &amp; Adjustment</b>              |                                                                                                                                                                                                                                                                                                                                                                                                                                                                                                      |                                                                                                                       |                 |                 |
| Age                                              | Age in whole years                                                                                                                                                                                                                                                                                                                                                                                                                                                                                   | Current                                                                                                               | Integer         | Integer         |
| Sex                                              | As defined in CHS files                                                                                                                                                                                                                                                                                                                                                                                                                                                                              | Current                                                                                                               | Male/<br>Female | Male/<br>Female |
| Long-term care facility resident                 | Is patient a long-term care facility resident per CHS files                                                                                                                                                                                                                                                                                                                                                                                                                                          | Current                                                                                                               | 0/1             | 0/1             |
| Confined to Home                                 | Is patient confined to their home per CHS files                                                                                                                                                                                                                                                                                                                                                                                                                                                      | Current                                                                                                               | 0/1             | 0/1             |
| Health-care worker                               | Is patient a health-care worker per CHS files                                                                                                                                                                                                                                                                                                                                                                                                                                                        | Current                                                                                                               | 0/1             | 0/1             |
| Continuous Membership in the Health Organization | Was patient a member of CHS for a full year before the index date                                                                                                                                                                                                                                                                                                                                                                                                                                    | Last Year                                                                                                             | 0/1             | 0/1             |

|                                                                                                  |                                                                                                                                                                                                                                                                                                                                                                                                                                                                                                                                           |                              |                                               |                                                                              |
|--------------------------------------------------------------------------------------------------|-------------------------------------------------------------------------------------------------------------------------------------------------------------------------------------------------------------------------------------------------------------------------------------------------------------------------------------------------------------------------------------------------------------------------------------------------------------------------------------------------------------------------------------------|------------------------------|-----------------------------------------------|------------------------------------------------------------------------------|
| Place of Residence                                                                               | Residency code in which the patient resides per CHS files                                                                                                                                                                                                                                                                                                                                                                                                                                                                                 | Current                      | List of places                                | -                                                                            |
| Infection positivity rate per place of residence                                                 | Number of positive results divided by number of tests per area                                                                                                                                                                                                                                                                                                                                                                                                                                                                            | Current                      | -                                             | 5 bins: 0-20% / 21-40% / 41-60% / 61-80% / 81%-100%                          |
| Population Sector                                                                                | As defined in CHS files                                                                                                                                                                                                                                                                                                                                                                                                                                                                                                                   | Current                      | General Jewish / Arab / Ultra-orthodox Jewish | General Jewish / Arab / Ultra-orthodox Jewish                                |
| Third vaccination month                                                                          | The month of the third vaccination                                                                                                                                                                                                                                                                                                                                                                                                                                                                                                        | Last year                    | 01-12                                         | 01-12                                                                        |
| Calendar day                                                                                     | The specific calendar day during the study period (the analysis is run through all calendar days)                                                                                                                                                                                                                                                                                                                                                                                                                                         | Current                      | -                                             | Dates between January 3 <sup>rd</sup> 2022 and February 8 <sup>th</sup> 2022 |
| Number of hospital admissions                                                                    | Number of hospital admissions in the past 3 years                                                                                                                                                                                                                                                                                                                                                                                                                                                                                         | Last 3 years                 | 0/1/2/<br>3-4/5+                              | Integer                                                                      |
| CDC Risk Factors Count (count of pre-existing conditions considered by the CDC as risk criteria) | Summation of 1 point for each of the following: <ul style="list-style-type: none"> <li>• Cancer</li> <li>• CKD</li> <li>• Heart Disease</li> <li>• Sickle Cell Disease</li> <li>• Asthma</li> <li>• Cerebrovascular Disease</li> <li>• Hypertension</li> <li>• Neurological Disease</li> <li>• Liver Disease</li> <li>• Thalassemia</li> <li>• COPD or other respiratory disease</li> <li>• Type 1 or 2 Diabetes Mellitus</li> <li>• Solid organ transplant recipient or immunodeficiency</li> <li>• Obesity or severe obesity</li> </ul> | Based on the variables below | 0/1/2/3+                                      | Integer                                                                      |
| <b>Other covariates used for population description</b>                                          |                                                                                                                                                                                                                                                                                                                                                                                                                                                                                                                                           |                              |                                               |                                                                              |

|        |                                                                                                                                                                                                                                                                                                                                                                                                                                                                                                                                                                                                                                                                                                                                                                                                                                                                                                                                                                                                                                                                                                                                                                                         |      |   |   |
|--------|-----------------------------------------------------------------------------------------------------------------------------------------------------------------------------------------------------------------------------------------------------------------------------------------------------------------------------------------------------------------------------------------------------------------------------------------------------------------------------------------------------------------------------------------------------------------------------------------------------------------------------------------------------------------------------------------------------------------------------------------------------------------------------------------------------------------------------------------------------------------------------------------------------------------------------------------------------------------------------------------------------------------------------------------------------------------------------------------------------------------------------------------------------------------------------------------|------|---|---|
| Cancer | ICD9 Code 174*<br>ICD9 Code 175*<br>ICD9 Code 233.0<br>ICD9 Code V10.3<br>ICD9 Proc Code 85.4*<br>ICD9 Code 153*<br>ICD9 Code 154*<br>ICD9 Code V10.5*<br>ICD9 Code V10.6*<br>ICD9 Code 185<br>ICD9 Code V10.46<br>ICD9 Code 162*<br>ICD9 Code V10.1*<br>ICD9 Code 188*<br>ICD9 Code V10.51<br>ICD9 Code 183*<br>ICD9 Code V10.43<br>ICD9 Code 179<br>ICD9 Code 182*<br>ICD9 Code V10.42<br>ICD9 Code 157*<br>ICD9 Code 191*<br>ICD9 Code 192*<br>ICD9 Code V10.85<br>ICD9 Code 151*<br>ICD9 Code V10.04<br>ICD9 Code 172*<br>ICD9 Code V10.82<br>ICD9 Code 201*<br>ICD9 Code 200*<br>ICD9 Code 202.4*<br>ICD9 Code 204*<br>ICD9 Code 205*<br>ICD9 Code 206*<br>ICD9 Code 207.1*<br>ICD9 Code 208.1*<br>ICD9 Code 189*<br>ICD9 Code V10.52<br>ICD9 Code 160*<br>ICD9 Code 161*<br>ICD9 Code 164.0<br>ICD9 Code 195.0<br>ICD9 Code V10.21<br>ICD9 Code V10.22<br>ICD9 Code 180*<br>ICD9 Code V10.41<br>ICD9 Code 140*<br>ICD9 Code 141*<br>ICD9 Code 142*<br>ICD9 Code 143*<br>ICD9 Code 144*<br>ICD9 Code 145*<br>ICD9 Code 150*<br>ICD9 Code V10.03<br>ICD9 Code 155*<br>ICD9 Code 156*<br>ICD9 Code V10.07<br>ICD9 Code 170*<br>ICD9 Code V10.81<br>ICD9 Code 193<br>ICD9 Code V10.87 | Ever | - | - |
|--------|-----------------------------------------------------------------------------------------------------------------------------------------------------------------------------------------------------------------------------------------------------------------------------------------------------------------------------------------------------------------------------------------------------------------------------------------------------------------------------------------------------------------------------------------------------------------------------------------------------------------------------------------------------------------------------------------------------------------------------------------------------------------------------------------------------------------------------------------------------------------------------------------------------------------------------------------------------------------------------------------------------------------------------------------------------------------------------------------------------------------------------------------------------------------------------------------|------|---|---|

|                                       |                                                                                                                                                                                                                                                                                                                                                                               |                                                               |   |   |
|---------------------------------------|-------------------------------------------------------------------------------------------------------------------------------------------------------------------------------------------------------------------------------------------------------------------------------------------------------------------------------------------------------------------------------|---------------------------------------------------------------|---|---|
| Chronic Kidney Disease                | ICD Proc Code 39.95<br>ICD Proc Code 54.98<br>ICD9 Code 996.81<br>ICD9 Code V42.0<br>ICD Proc Code 55.6*<br>ICD9 Code 403._1<br>ICD9 Code 404._2<br>ICD9 Code 404._3<br>ICD9 Code 585*<br>ICD9 Code 586<br>ICD9 Code 250.4*<br>ICD9 Code 274.1*<br>ICD9 Code 440.1<br>ICD9 Code 581*<br>ICD9 Code 582*<br>ICD9 Code 583*<br>ICD9 Code 587<br>ICD9 Code 588*<br>ICD9 Code 589* | Ever                                                          | - | - |
| Chronic Obstructive Pulmonary Disease | ICD9 Code 491*<br>ICD9 Code 492*<br>ICD9 Code 496                                                                                                                                                                                                                                                                                                                             | Ever                                                          | - | - |
| Heart Conditions                      | ICD9 Code 410*<br>ICD9 Code 411*<br>ICD9 Code 412<br>ICD9 Code 413*<br>ICD9 Code 414*<br>ICD9 Code 429.2, 429.7*<br>ICD9 Code V45.81,<br>V45.82<br>ICD9 Proc Code 36.0*<br>ICD9 Proc Code 36.1*<br>ICD9 Code 428*<br>ICD9 Code 398.91<br>ICD9 Code 402._1<br>ICD9 Code 404._1, ICD9<br>Code 404._3<br>ICD9 Code 416.9<br>ICD9 Code 514<br>ICD9 Code 425*<br>ICD9 Code 416*    | Ever                                                          | - | - |
| Solid Organ Transplant Recipient      | ICD9 Code 996.81<br>ICD9 Code V42.0<br>ICD Proc Code 55.6*<br>ICD9 Code V42.7<br>ICD Proc Code 50.5*<br>ICD9 Code V42.1<br>ICD9 Code V43.2<br>ICD Proc Code 37.5<br>ICD9 Code V42.83<br>ICD Proc Code 52.8*<br>ICD9 Code V42.6<br>ICD Proc Code 33.5*<br>ICD Proc Code 33.6                                                                                                   | Ever                                                          | - | - |
| Obesity                               | Body Mass Index (BMI)<br>30-40                                                                                                                                                                                                                                                                                                                                                | Latest measurement in last 5 years not taken during pregnancy | - | - |

|                           |                                                                                                                                                                                                                                                                                                 |                                                                                |   |   |
|---------------------------|-------------------------------------------------------------------------------------------------------------------------------------------------------------------------------------------------------------------------------------------------------------------------------------------------|--------------------------------------------------------------------------------|---|---|
| Severe Obesity            | Body Mass Index (BMI)<br>40+                                                                                                                                                                                                                                                                    | Latest measurement in last 5 years not taken during pregnancy                  | - | - |
| Sickle Cell Disease       | ICD9 Code 282.6*                                                                                                                                                                                                                                                                                | Ever                                                                           | - | - |
| Smoking                   | Internal Clalit Registry                                                                                                                                                                                                                                                                        | Last recorded value                                                            | - | - |
| Type 2 Diabetes Mellitus  | HbA1C > 6.5<br>ATC Codes A10[A,B]<br>ICD9 Code 250.*<br>ICD9 Code 357.2<br>ICD9 Code 362.0*<br><br><b>And not:</b><br>ICD9 Code 250._1, 250._3                                                                                                                                                  | For diagnosis codes, Ever;<br>For drugs, 4 or more dispensed in last 12 months | - | - |
| Asthma                    | ICD9 Code 493*                                                                                                                                                                                                                                                                                  | Ever                                                                           | - | - |
| Cerebrovascular Disease   | ICD9 Code 362.34<br>ICD9 Code 430<br>ICD9 Code 431<br>ICD9 Code 432*<br>ICD9 Code 433*<br>ICD9 Code 434*<br>ICD9 Code 435*<br>ICD9 Code 436*<br>ICD9 Code 438*                                                                                                                                  | Ever                                                                           | - | - |
| Other Respiratory Disease | ICD9 Code 277.0*<br>ICD9 Code 494*<br>ICD9 Code 515                                                                                                                                                                                                                                             | Ever                                                                           | - | - |
| Hypertension              | ICD9 Code 401*<br>ICD9 Code 402*<br>ICD9 Code 403*<br>ICD9 Code 404*<br>ICD9 Code 405*                                                                                                                                                                                                          | Ever                                                                           | - | - |
| Immunocompromised State   | <b>Any of:</b><br>ICD9 Code 042*<br>ICD9 Code 043*<br>ICD9 Code 044*<br>ICD9 Code 795.71<br>ICD9 Code V08<br>ICD9 Code V42.8*<br>ICD9 Proc Code 41.0*<br><br><b>Or at least 2 of:</b><br>ATC4 Code H02AB<br>ATC4 Code H02BX<br>ATC4 Code M01BA<br><br><b>Or at least 2 of:</b><br>ATC2 Code L04 | For diagnosis codes, Ever;<br>For drugs, 4 or more dispensed in last 12 months | - | - |
| Neurologic Conditions     | ICD9 Code 290.*<br>ICD9 Code 294*<br>ICD9 Code 310.1<br>ICD9 Code 331*<br>ATC Codes N06DA02,<br>N06DA03<br>ICD9 Code 358*<br>ICD9 Code 332.[0,1]                                                                                                                                                | For diagnosis codes, Ever;<br>For drugs, 4 or more dispensed in last 12 months | - | - |

|                          |                                                                                                                                                                                                                                                                                                                                                                                                                                                                                                                             |                                                               |   |   |
|--------------------------|-----------------------------------------------------------------------------------------------------------------------------------------------------------------------------------------------------------------------------------------------------------------------------------------------------------------------------------------------------------------------------------------------------------------------------------------------------------------------------------------------------------------------------|---------------------------------------------------------------|---|---|
|                          | ICD9 Code 345*<br>ICD9 Code 340<br>ATC Codes L03AB07,<br>L03AB08, L04AA07<br>ICD9 Code 343*<br>ICD9 Code 333.4<br>ICD9 Code 334*<br>ICD9 Code 356*<br>ICD9 Code 138<br>ICD9 Code 335*<br>ICD9 Code 730.7*<br>ICD9 V12.02<br>ICD9 Code 228.02<br>ICD9 Code 307.23<br>ICD9 Code 330.9<br>ICD9 Code 331.3*<br>ICD9 Code 331.4<br>ICD9 Code 333*<br>ICD9 Code 334*<br>ICD9 Code 336*<br>ICD9 Code 337<br>ICD9 Code 335.1*<br>ICD9 Code 359.0<br>ICD9 Code 359.21<br>ICD9 Code 357.0<br>ICD9 Code 237.7*<br>ICD9 Code 742.8[1,2] |                                                               |   |   |
| Liver Disease            | ICD9 Code 070.22<br>ICD9 Code 070.23<br>ICD9 Code 070.32<br>ICD9 Code 070.33<br>ICD9 Code 070.44<br>ICD9 Code 070.54<br>ICD9 Code V02.61<br>ICD9 Code V02.62<br>ICD9 Code 571*<br>ICD9 Code 275.1<br>ICD9 Code 277.4<br>ICD9 Code 452<br>ICD9 Code 453.0<br>ICD9 Code 571.8<br>ICD9 Code 571.9<br>ICD9 Code 572*                                                                                                                                                                                                            | Ever                                                          | - | - |
| Overweight               | Body Mass Index (BMI)<br>25-30                                                                                                                                                                                                                                                                                                                                                                                                                                                                                              | Latest measurement in last 5 years not taken during pregnancy | - | - |
| Thalassemia              | ICD9 Code 282.4*                                                                                                                                                                                                                                                                                                                                                                                                                                                                                                            | Ever                                                          | - | - |
| Type 1 Diabetes Mellitus | ICD9 Code 250._1, 250._3                                                                                                                                                                                                                                                                                                                                                                                                                                                                                                    | Ever                                                          | - | - |

<sup>1</sup>Additional confirmation of the diagnostic codes was done by checking the matching of the free text within the diagnosis description field.

<sup>2</sup>Covariates were extracted at the beginning of the calendar month in which the index date occurred.

**Table S2 – A comparison of the baseline characteristics of the total eligible vaccinated population, the matched vaccinated population and the unmatched (to the exposed group) vaccinated population**

| <b>Variable</b>                                     | <b>Total Eligible for Inclusion in Exposed Group, N = 258,994</b> | <b>Exposed Group, N = 182,122</b> | <b>Unmatched to Exposed Group, N = 76,872</b> |
|-----------------------------------------------------|-------------------------------------------------------------------|-----------------------------------|-----------------------------------------------|
| <b>Age</b>                                          | 73 (67, 79)                                                       | 72 (67, 78)                       | 74 (68, 81)                                   |
| <b>Age Group</b>                                    |                                                                   |                                   |                                               |
| 60-69                                               | 90,701 (35%)                                                      | 67,778 (37%)                      | 22,923 (30%)                                  |
| 70-79                                               | 107,620 (42%)                                                     | 76,630 (42%)                      | 30,990 (40%)                                  |
| 80+                                                 | 60,673 (23%)                                                      | 37,714 (21%)                      | 22,959 (30%)                                  |
| <b>Sex</b>                                          |                                                                   |                                   |                                               |
| F                                                   | 133,282 (51%)                                                     | 97,113 (53%)                      | 36,169 (47%)                                  |
| M                                                   | 125,712 (49%)                                                     | 85,009 (47%)                      | 40,703 (53%)                                  |
| <b>Population Sector</b>                            |                                                                   |                                   |                                               |
| General Jewish                                      | 243,651 (94%)                                                     | 173,689 (95%)                     | 69,962 (91%)                                  |
| Arab                                                | 9,178 (3.5%)                                                      | 4,828 (2.7%)                      | 4,350 (5.7%)                                  |
| Ultra-Orthodox Jewish                               | 6,165 (2.4%)                                                      | 3,605 (2.0%)                      | 2,560 (3.3%)                                  |
| <b>Number of hospital admissions (past 3 years)</b> |                                                                   |                                   |                                               |
| 0                                                   | 184,499 (71%)                                                     | 140,226 (77%)                     | 44,273 (58%)                                  |
| 1                                                   | 44,502 (17%)                                                      | 27,612 (15%)                      | 16,890 (22%)                                  |
| 2                                                   | 16,295 (6.3%)                                                     | 8,310 (4.6%)                      | 7,985 (10%)                                   |
| 3-4                                                 | 10,116 (3.9%)                                                     | 4,692 (2.6%)                      | 5,424 (7.1%)                                  |
| 5+                                                  | 3,582 (1.4%)                                                      | 1,282 (0.7%)                      | 2,300 (3.0%)                                  |
| <b>CDC Risk Factors Count</b>                       |                                                                   |                                   |                                               |
| 0                                                   | 43,408 (17%)                                                      | 31,533 (17%)                      | 11,875 (15%)                                  |
| 1                                                   | 59,304 (23%)                                                      | 42,236 (23%)                      | 17,068 (22%)                                  |
| 2                                                   | 58,992 (23%)                                                      | 40,275 (22%)                      | 18,717 (24%)                                  |
| 3+                                                  | 97,290 (38%)                                                      | 68,078 (37%)                      | 29,212 (38%)                                  |
| <b>CDC Risk Factors</b>                             |                                                                   |                                   |                                               |
| Cancer                                              | 14,123 (5.5%)                                                     | 9,228 (5.1%)                      | 4,895 (6.4%)                                  |
| Chronic Kidney Disease                              | 47,529 (18%)                                                      | 32,343 (18%)                      | 15,186 (20%)                                  |
| Chronic Obstructive Pulmonary Disease               | 15,882 (6.1%)                                                     | 10,919 (6.0%)                     | 4,963 (6.5%)                                  |
| Heart Disease                                       | 61,521 (24%)                                                      | 41,018 (23%)                      | 20,503 (27%)                                  |



|                                  |               |               |              |
|----------------------------------|---------------|---------------|--------------|
| Solid Organ Transplant           | 250 (<0.1%)   | 171 (<0.1%)   | 79 (0.1%)    |
| Obesity (BMI 30-40)              | 68,436 (26%)  | 48,949 (27%)  | 19,487 (25%) |
| Severe Obesity (BMI 40+)         | 4,911 (1.9%)  | 3,548 (1.9%)  | 1,363 (1.8%) |
| Sickle Cell Disease              | 14 (<0.1%)    | 4 (<0.1%)     | 10 (<0.1%)   |
| Smoking                          | 27,962 (11%)  | 20,224 (11%)  | 7,738 (10%)  |
| Type 2 Diabetes Mellitus         | 84,137 (32%)  | 59,936 (33%)  | 24,201 (31%) |
| <b>Possible CDC Risk Factors</b> |               |               |              |
| Asthma                           | 18,193 (7.0%) | 12,806 (7.0%) | 5,387 (7.0%) |
| Cerebrovascular Disease          | 27,902 (11%)  | 18,319 (10%)  | 9,583 (12%)  |
| Other Respiratory Disease        | 3,170 (1.2%)  | 2,232 (1.2%)  | 938 (1.2%)   |
| Hypertension                     | 148,096 (57%) | 103,260 (57%) | 44,836 (58%) |
| Immunosuppression                | 16,214 (6.3%) | 11,304 (6.2%) | 4,910 (6.4%) |
| Neurological Disease             | 31,546 (12%)  | 21,295 (12%)  | 10,251 (13%) |
| Liver Disease                    | 8,889 (3.4%)  | 6,221 (3.4%)  | 2,668 (3.5%) |
| Overweight (BMI 25-30)           | 109,322 (42%) | 76,447 (42%)  | 32,875 (43%) |
| Thalassemia                      | 1,061 (0.4%)  | 732 (0.4%)    | 329 (0.4%)   |
| Type 1 Diabetes Mellitus         | 2,393 (0.9%)  | 1,614 (0.9%)  | 779 (1.0%)   |

**Table S3 - Vaccine effectiveness (1 - Risk Ratio) and Risk Difference for the sensitivity analysis in which censoring of control members who received a fourth vaccine dose is delayed by 7 days**

| Period                           | PCR-confirmed SARS-CoV-2 infection |                           | Symptomatic COVID-19 |                           | COVID-19-related hospitalization |                     | Severe COVID-19 |                  | COVID-19-related death |                 |
|----------------------------------|------------------------------------|---------------------------|----------------------|---------------------------|----------------------------------|---------------------|-----------------|------------------|------------------------|-----------------|
|                                  | 1-RR (95-CI)                       | RD (95-CI)                | 1-RR (95-CI)         | RD (95-CI)                | 1-RR (95-CI)                     | RD (95-CI)          | 1-RR (95-CI)    | RD (95-CI)       | 1-RR (95-CI)           | RD (95-CI)      |
| <b>7-30 days after 4th dose</b>  | 43% (41%-45%)                      | 3,419.9 (3,186.4-3,616.2) | 53% (50%-56%)        | 1,645.3 (1,515.3-1,774.8) | 65% (57%-72%)                    | 167.8 (132.0-205.7) | 61% (43%-73%)   | 62.5 (38.1-85.8) | 68% (27%-89%)          | 17.9 (4.9-28.9) |
| <b>14-30 days after 4th dose</b> | 49% (46%-51%)                      | 2,636.7 (2,445.0-2,816.9) | 59% (56%-62%)        | 1,225.7 (1,116.6-1,339.5) | 70% (60%-78%)                    | 132.6 (103.8-165.5) | 64% (48%-79%)   | 50.5 (32.0-75.0) | 70% (30%-91%)          | 15.7 (4.5-27.3) |

**Table S4 - Vaccine effectiveness (VE) estimates for the Poisson Regression days 7+ model**

| <b>Exposure Period</b>       | <b>Adjusted VE (1-IRR)</b> |
|------------------------------|----------------------------|
| 3rd Vaccine > 4 months prior | Reference                  |
| Days 1-4 from 4th vaccine    | 0.26 (0.24-0.29)           |
| Days 5-6 from 4th vaccine    | 0.09 (0.03-0.14)           |
| Days 7-30 from 4th vaccine   | 0.44 (0.43-0.45)           |

**Table S5 - Vaccine effectiveness (VE) estimates for the Poisson Regression days 14+ model**

| <b>Exposure Period</b>       | <b>Adjusted VE (1-IRR)</b> |
|------------------------------|----------------------------|
| 3rd Vaccine > 4 months prior | Reference                  |
| Days 1-4 from 4th vaccine    | 0.31 (0.28-0.33)           |
| Days 5-6 from 4th vaccine    | 0.06 (0.02-0.11)           |
| Days 7-13 from 4th vaccine   | 0.3 (0.28-0.32)            |
| Days 14-30 from 4th vaccine  | 0.52 (0.51-0.53)           |

**Table S6 - Vaccine effectiveness (VE) estimates for the Poisson Regression daily vaccine effectiveness (1-IRR) model**

| <b>Exposure Period</b>       | <b>Adjusted VE (1-IRR)</b> |
|------------------------------|----------------------------|
| 3rd Vaccine > 4 months prior | Reference                  |
| Day 1 from 4th vaccine       | 0.55 (0.5-0.59)            |
| Day 2 from 4th vaccine       | 0.29 (0.24-0.35)           |
| Day 3 from 4th vaccine       | 0.2 (0.14-0.26)            |
| Day 4 from 4th vaccine       | 0.2 (0.14-0.25)            |
| Day 5 from 4th vaccine       | 0.06 (0-0.11)              |
| Day 6 from 4th vaccine       | 0.07 (0.01-0.12)           |
| Day 7 from 4th vaccine       | 0.09 (0.04-0.15)           |
| Day 8 from 4th vaccine       | 0.15 (0.1-0.2)             |
| Day 9 from 4th vaccine       | 0.26 (0.21-0.31)           |
| Day 10 from 4th vaccine      | 0.3 (0.25-0.35)            |
| Day 11 from 4th vaccine      | 0.38 (0.33-0.42)           |
| Day 12 from 4th vaccine      | 0.45 (0.41-0.49)           |
| Day 13 from 4th vaccine      | 0.46 (0.41-0.5)            |
| Day 14 from 4th vaccine      | 0.49 (0.45-0.53)           |
| Day 15 from 4th vaccine      | 0.53 (0.49-0.57)           |
| Day 16 from 4th vaccine      | 0.56 (0.52-0.6)            |
| Day 17 from 4th vaccine      | 0.59 (0.55-0.63)           |
| Day 18 from 4th vaccine      | 0.57 (0.53-0.61)           |
| Day 19 from 4th vaccine      | 0.52 (0.47-0.56)           |
| Day 20 from 4th vaccine      | 0.55 (0.51-0.59)           |
| Day 21 from 4th vaccine      | 0.47 (0.43-0.52)           |
| Day 22 from 4th vaccine      | 0.55 (0.51-0.59)           |
| Day 23 from 4th vaccine      | 0.59 (0.55-0.63)           |
| Day 24 from 4th vaccine      | 0.53 (0.48-0.57)           |

|                         |                  |
|-------------------------|------------------|
| Day 25 from 4th vaccine | 0.51 (0.46-0.56) |
| Day 26 from 4th vaccine | 0.51 (0.46-0.56) |
| Day 27 from 4th vaccine | 0.46 (0.4-0.51)  |
| Day 28 from 4th vaccine | 0.46 (0.4-0.51)  |
| Day 29 from 4th vaccine | 0.37 (0.31-0.43) |
| Day 30 from 4th vaccine | 0.48 (0.41-0.54) |
